# Supplementary material for: Extensive terminal and asymmetric processing of small RNAs from rRNAs, snoRNAs, snRNAs, and tRNAs
Source: PubMed Central journal article supplement — Nucleic Acids Res. 2012 Apr 9;40(14):6787–99. doi: 10.1093/nar/gks307 (PMC3413118; doi:10.1093/nar/gks307), 2012-04-09
Supplement: supp_gks307_nar-00379-n-2012-File002.pdf [file supp_gks307_nar-00379-n-2012-File002.pdf]

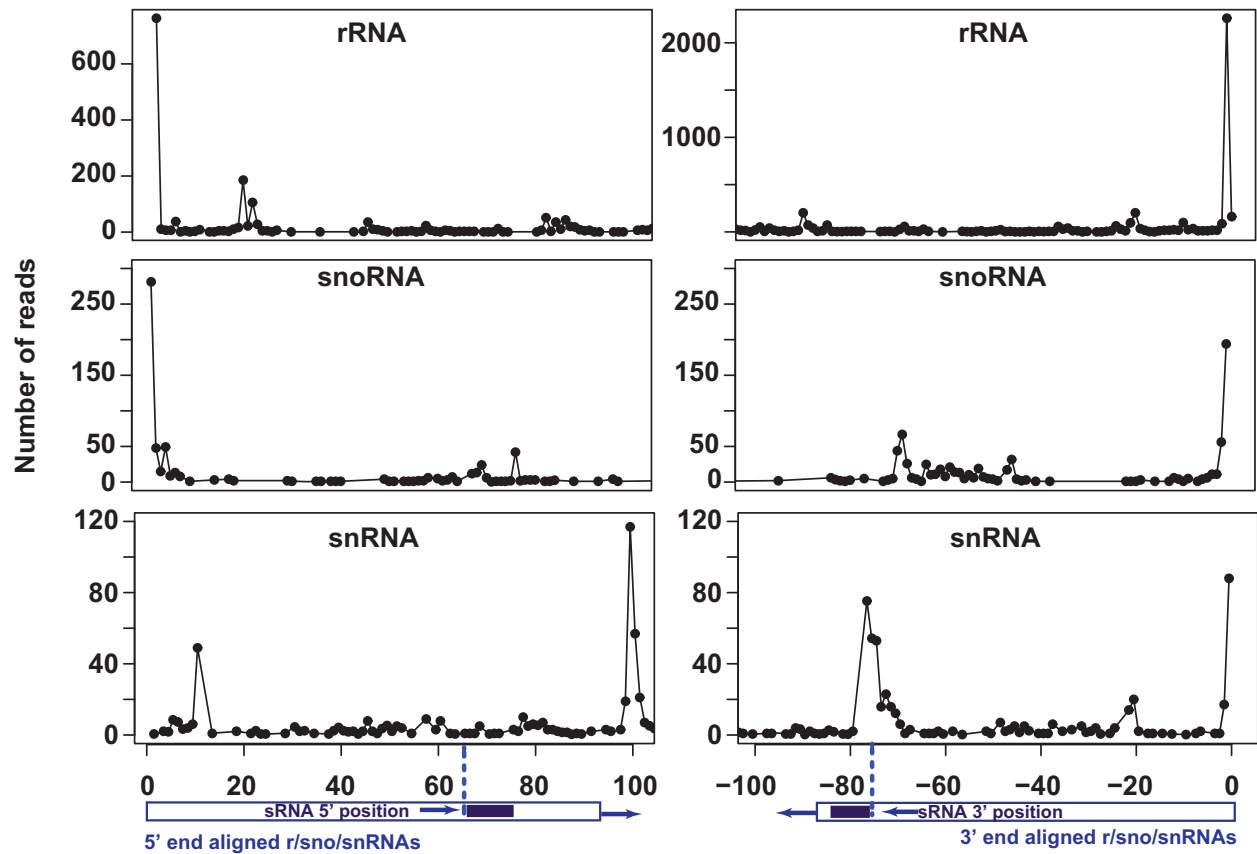

**Figure S1. Comparison of abundance of RNA fragments deriving from rRNAs and snoRNAs, and snRNA in BCP1.** Analysis indicate that the 3' and 5' terminal small RNAs are cloned multiple times, and that rRNA-derived reads are more abundant than snoRNAs and snRNAs, but less abundant than tRFs.

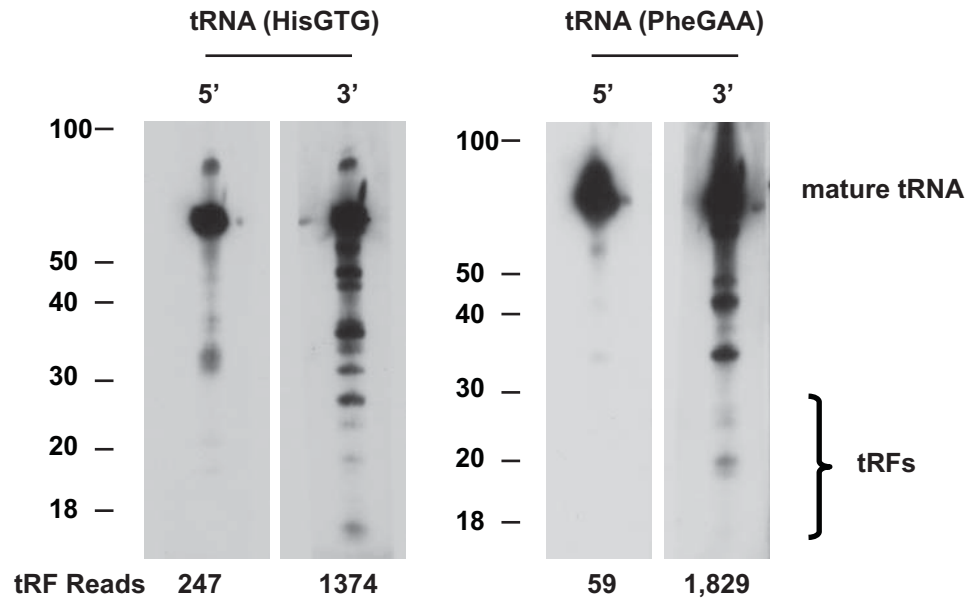

**Figure S2. Comparison of abundance of 5' and 3' tRFs of two distinct tRNAs (HEK 293).** Consistent with the deep sequencing results (tRF reads), the 3' tRF intensities are considerably more than that of the 5' tRFs in both cases.

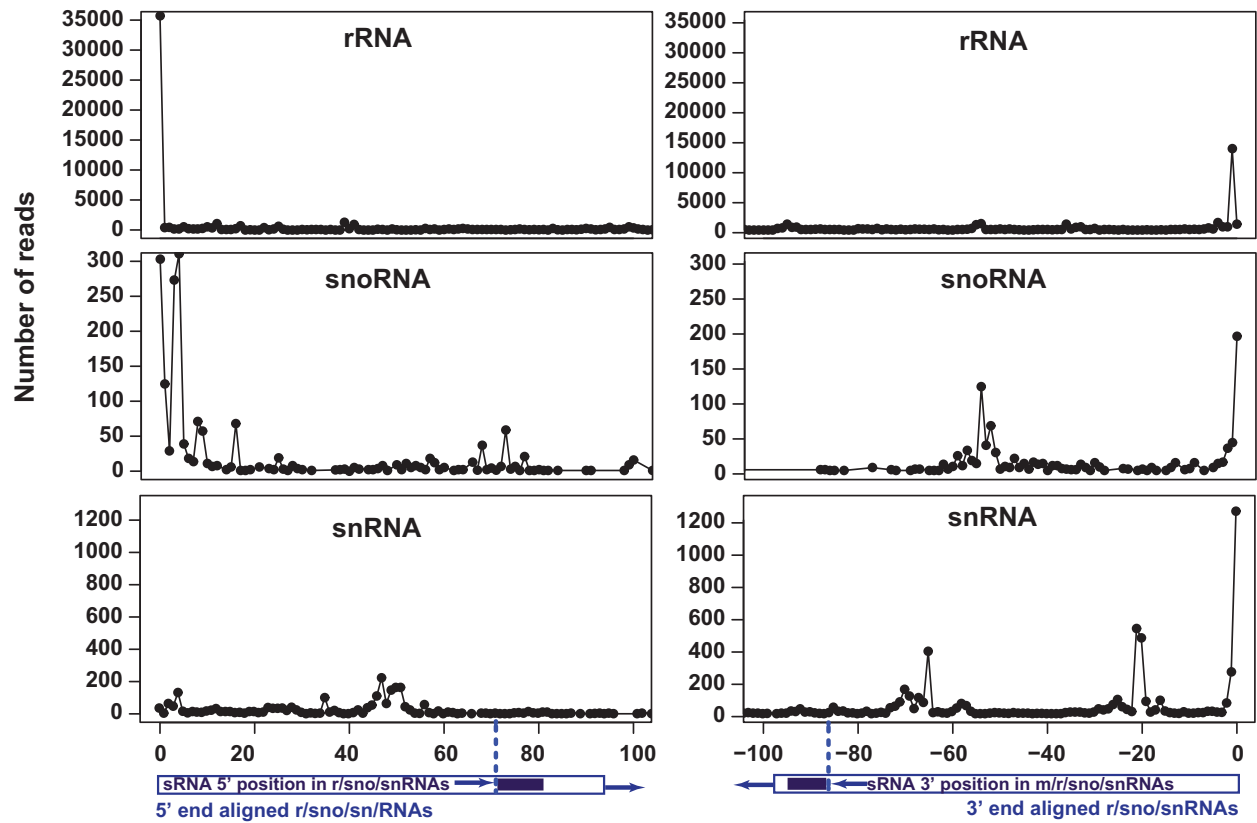

**Figure S3. Small terminal 5'/3' RNA fragments of rRNAs and snoRNAs, 3' snRNA are present in mouse embryonic stem cells.** Similar to human terminal RNA fragments, rRNA-derived fragments are more abundant than snoRNAs, and snRNAs, but less than that of mouse tRFs (Figure 4A).

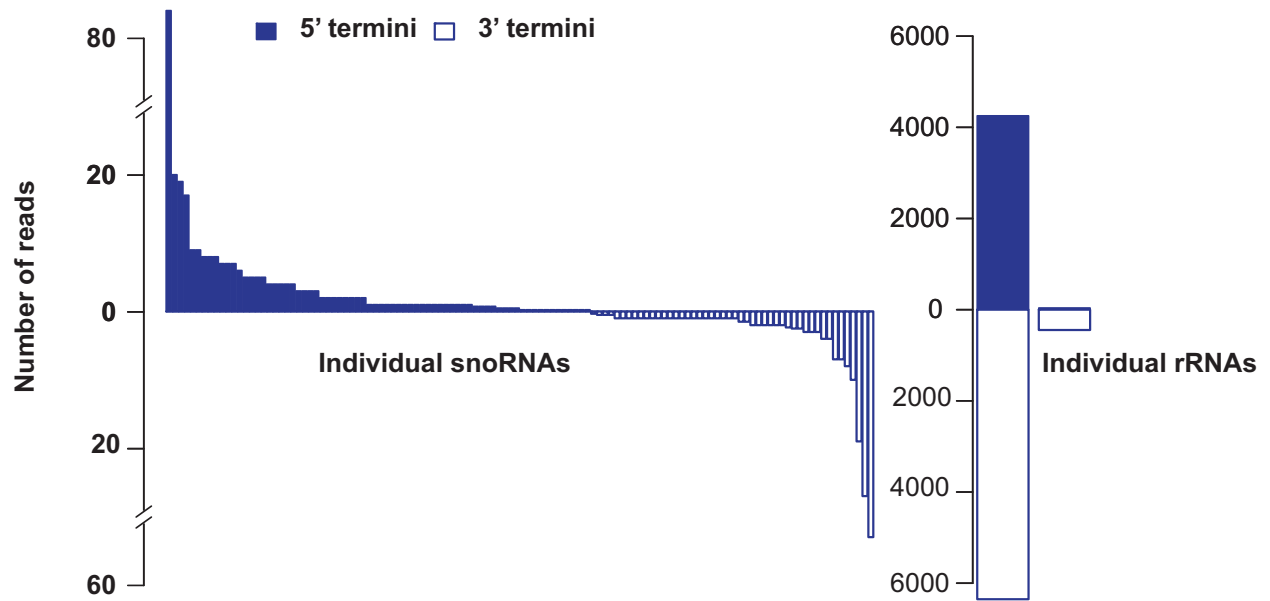

**Figure S4. Strand bias of snoRNAs (left) and rRNAs (right) in mouse embryonic stem cells.** X axis represents one individual snoRNA or rRNA.

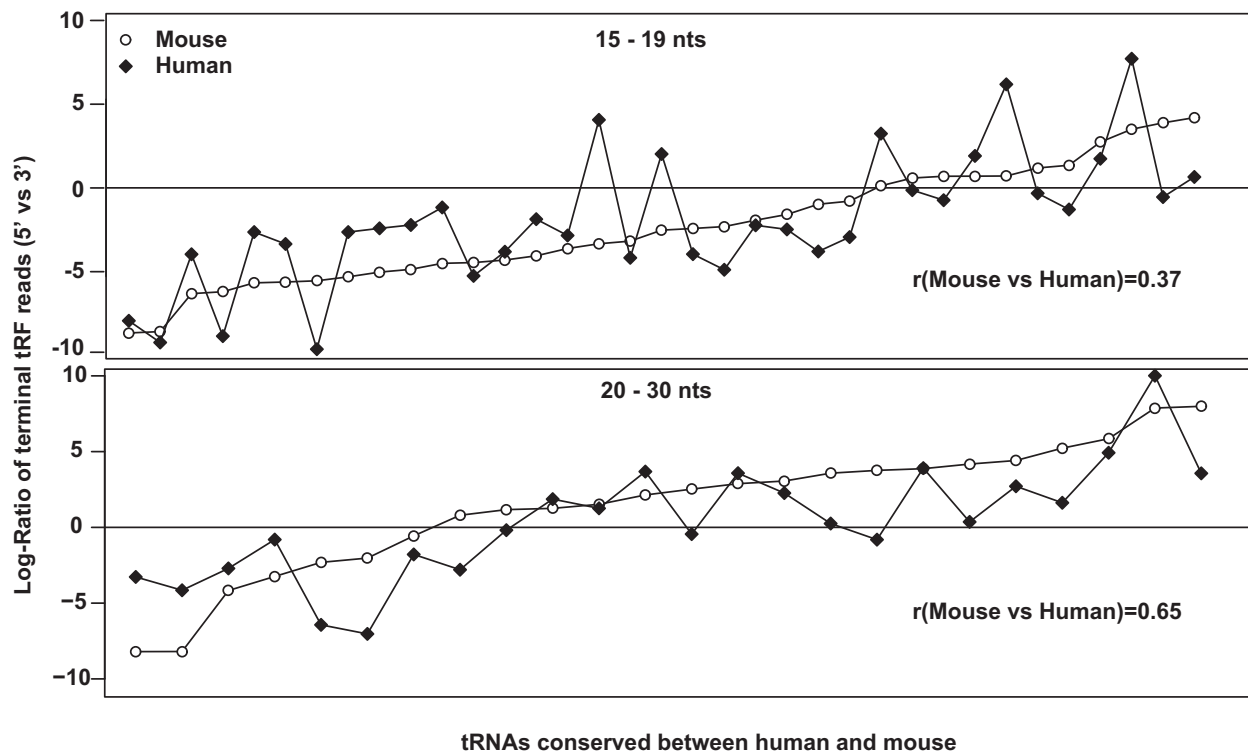

**Figure S5. Comparison between asymmetric processing of human and mouse putative tRNA orthologs.** Sequencing data of tRFs (reads/million  $\geq 10$ ) human 293 cells and mES cells are used for comparison.

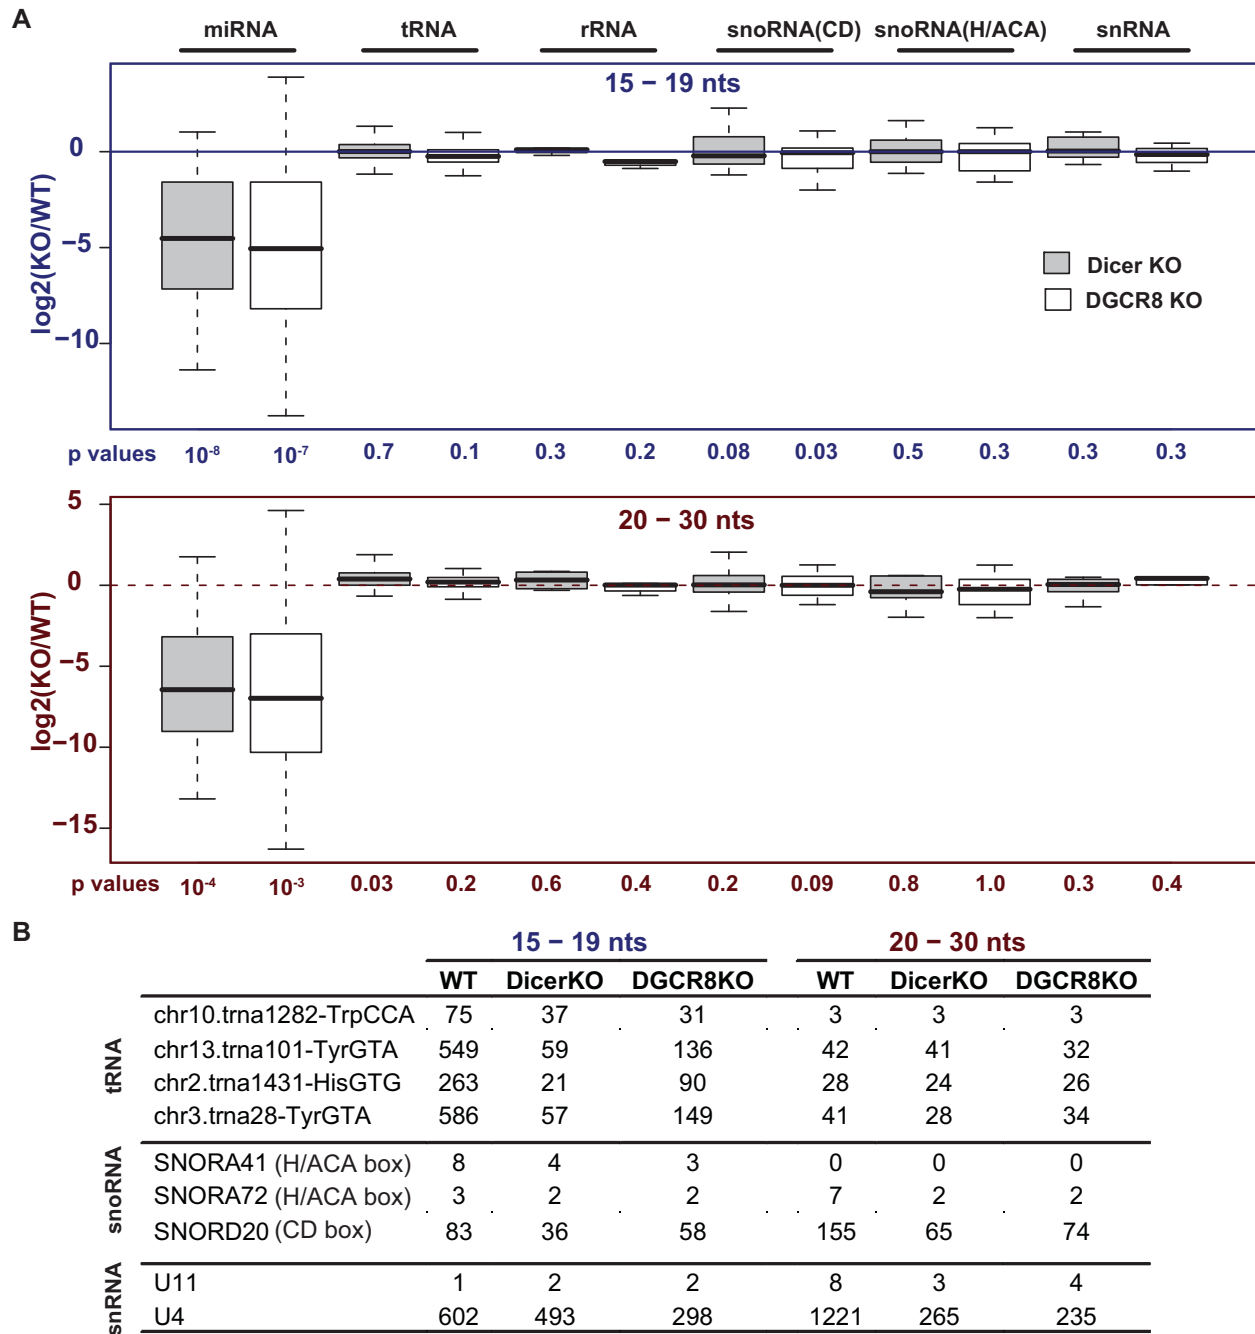

**Figure S6. Terminal small RNAs are largely independent of Dicer and Dgcr8 processing.** (A) Boxplots based on log<sub>2</sub>-ratio (WT vs KO) of the RNA reads. Median (bar) and standard interquartile range (IQR) outliers (whiskers, 1.5x IQR) are represented along with p-values (paired t-tests). Small RNA classes other than miRNAs do not manifest an overall dependence on Dicer/DGCR8. (B) List of terminal RNAs that are down-regulated (>2 fold) upon both Dicer and Drosha KOs at either the 15–19 or 20–30 base long RNA groups.

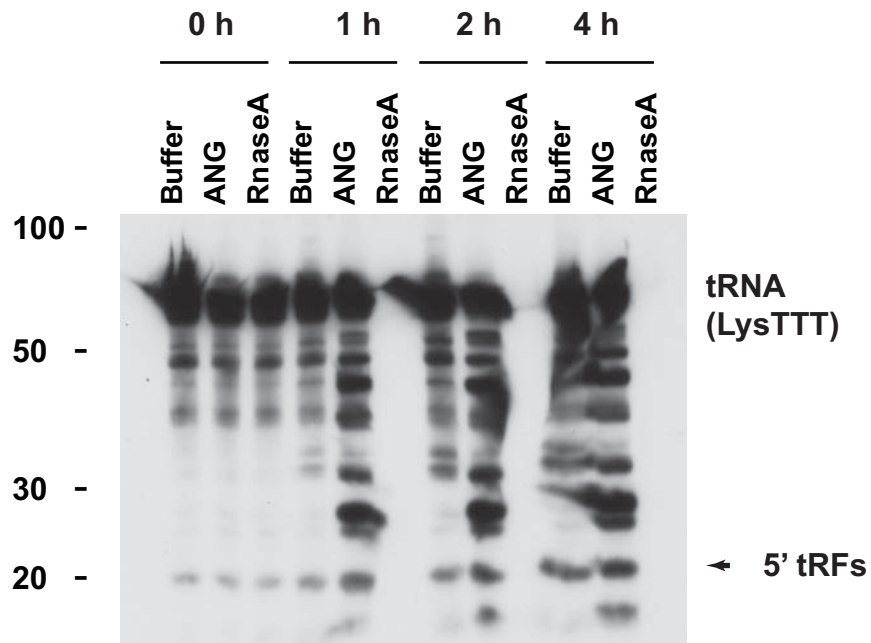

**Figure S7. ANG can generate 5' tRFs.** Total RNA from 293 cells were subject to cleavage by control buffer, RNase A (10  $\mu$ g/ml), and ANG (10  $\mu$ g/ml). ANG enhances the expression of the endogenous small fragment (~ 20 nts) in a time-dependent manner.

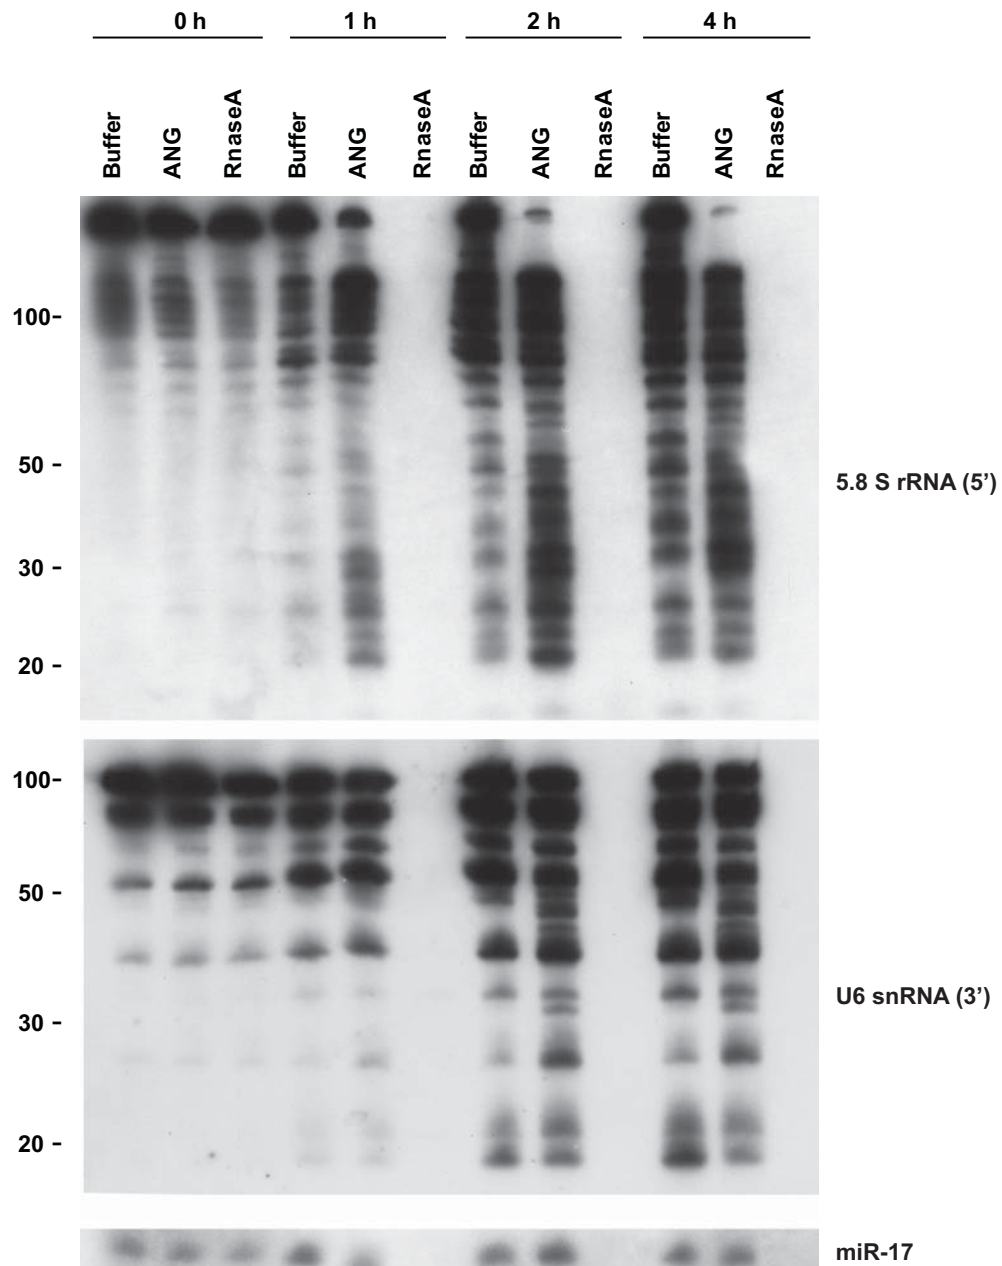

**Fig S8. In vitro cleavage assay of 5.8S rRNA and U6 snRNA.** Total RNA from 293 cells were treated with ANG (10  $\mu$ g/ml), buffer control, or RNase A for different time periods and subjected to northern blot using probes against the 5' terminal of 5.8 S rRNA (upper) or 3' terminal of U6 snRNA (middle). The same membrane was stripped and re-probed with a miR-17 probe to ensure equal loading of RNA in all lanes.



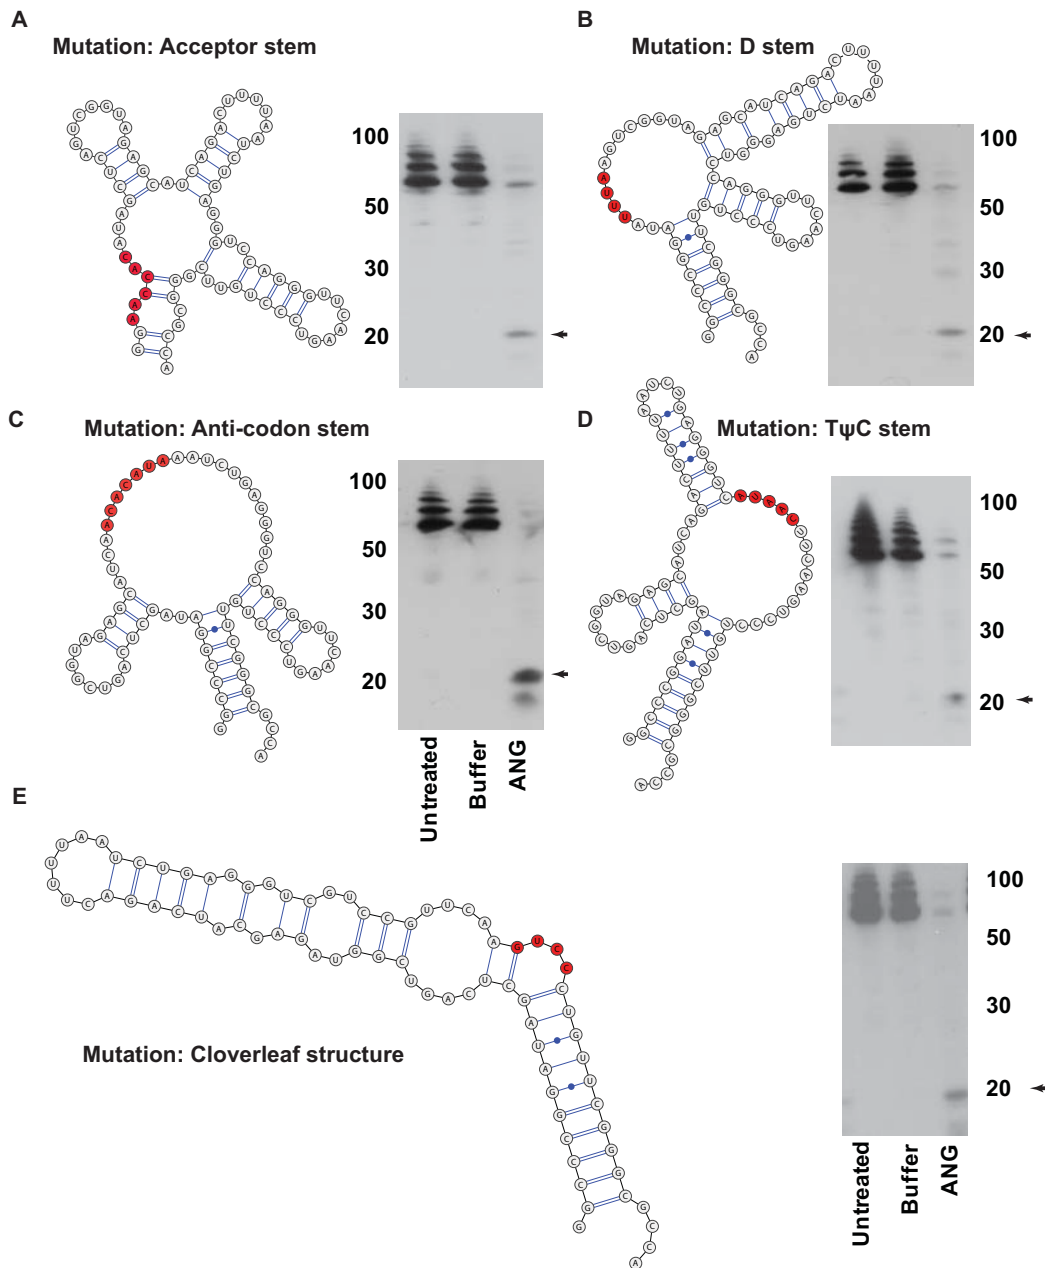

**Figure S9. Effect of various mutations on ANG processing of tRFs.** tRNA molecules with mutations (red) that disrupt specific tRNA sub-structures were subject to cleavage by ANG (0.5 h). Working buffer is used as a control. The disrupted structures include the acceptor stem (A), the D stem (B), the anti-codon stem (C) the T $\psi$ C stem (D), and the entire clover-leaf structure (E). None of these mutations greatly affects tRF processing by ANG.
